# Supplementary material for: Species and size diversity in protective services offered by coral guard-crabs
Source: PubMed Central journal article supplement (PMC4183949; doi:10.7717/peerj.574), 2014-09-30

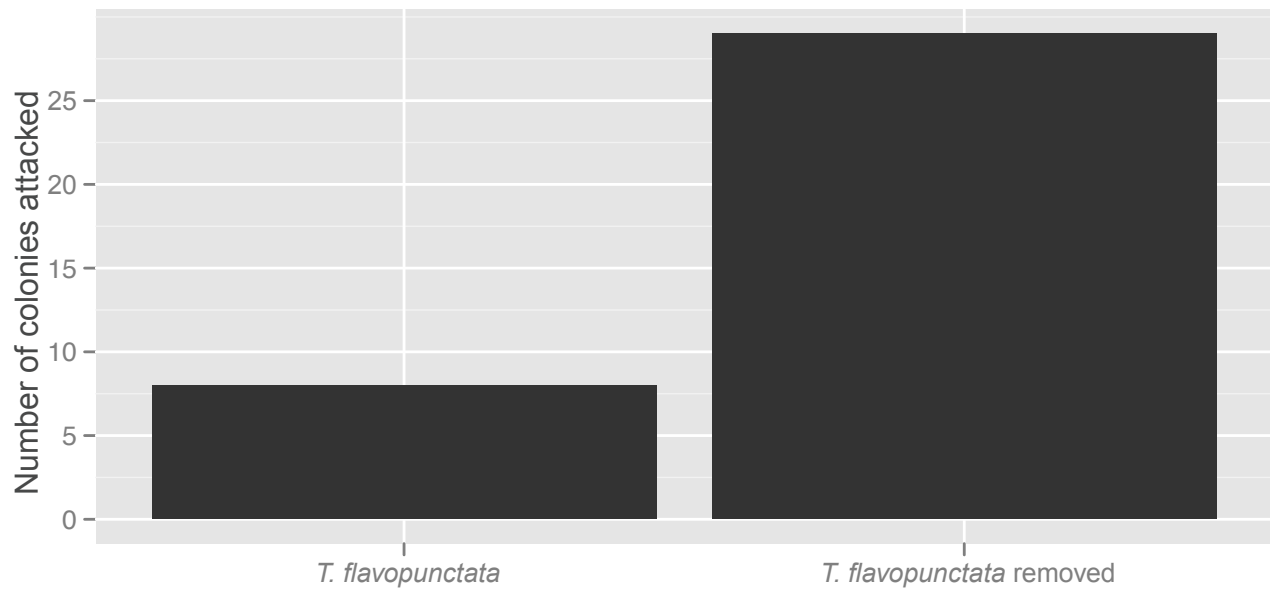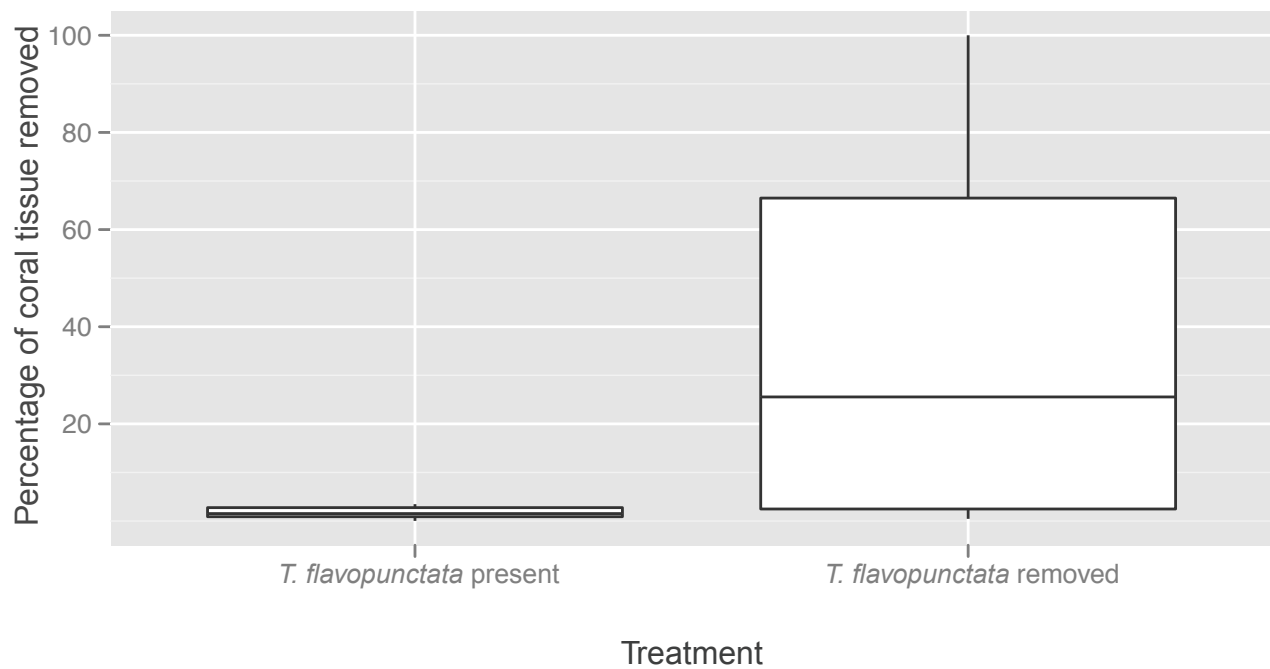

Supplement: peerj-02-574-s001.pdf [file peerj-02-574-s001.pdf]
