# Supplementary material for: Species and size diversity in protective services offered by coral guard-crabs
Source: PeerJ. 2014 Sep 30;2:e574. doi: 10.7717/peerj.574 (PMC4183949; doi:10.7717/peerj.574)
Supplement: Supplemental Information 2 [file peerj-02-574-s002.xls]

## Sheet: EdouyxiNozero.csv
Coral Number	Treatment	Coral Volume	Total Damage	Final Volume	Percent volume tissue remaining	Percent reduction	Coral Tissue Lost	Treatment	Group
1	T.flavopunctata removed	21280	19548	1732	0.081391	0.918609	91.8609	T.flavopunctata removed	1
2	T.flavopunctata removed	66000	109032	-43032	-0.652	1	100	T.flavopunctata removed	1
5	T.flavopunctata removed	86016	3400	82616	0.960472	0.0395275	3.95275	T.flavopunctata removed	1
6	T.flavopunctata removed	41616	59832	-18216	-0.437716	1	100	T.flavopunctata removed	1
8	T.flavopunctata present	72600	844	71756	0.988375	0.0116253	1.16253	T.flavopunctata present	1
9	T.flavopunctata removed	67680	2654	65026	0.960786	0.0392139	3.92139	T.flavopunctata removed	1
11	T.flavopunctata removed	18900	12450	6450	0.34127	0.65873	65.873	T.flavopunctata removed	1
17	T.flavopunctata removed	32190	21990	10200	0.316869	0.683131	68.3131	T.flavopunctata removed	1
18	T.flavopunctata removed	22464	160	22304	0.992877	0.00712251	0.712251	T.flavopunctata removed	1
20	T.flavopunctata removed	31464	47756	-16292	-0.517798	1	100	T.flavopunctata removed	1
21	T.flavopunctata removed	95202	48708	46494	0.488372	0.511628	51.1628	T.flavopunctata removed	1
22	T.flavopunctata removed	31248	591	30657	0.981087	0.0189132	1.89132	T.flavopunctata removed	1
25	T.flavopunctata removed	28512	36182	-7670	-0.26901	1	100	T.flavopunctata removed	1
30	T.flavopunctata removed	39672	320	39352	0.991934	0.00806614	0.806614	T.flavopunctata removed	1
35	T.flavopunctata removed	36900	1296	35604	0.964878	0.035122	3.5122	T.flavopunctata removed	2
38	T.flavopunctata present	53280	1536	51744	0.971171	0.0288288	2.88288	T.flavopunctata present	2
40	T.flavopunctata removed	30996	18495	12501	0.40331	0.59669	59.669	T.flavopunctata removed	2
41	T.flavopunctata removed	22500	9555	12945	0.575333	0.424667	42.4667	T.flavopunctata removed	2
42	T.flavopunctata removed	51282	14784	36498	0.711712	0.288288	28.8288	T.flavopunctata removed	2
48	T.flavopunctata present	64064	1224	62840	0.980894	0.0191059	1.91059	T.flavopunctata present	2
50	T.flavopunctata removed	94605	21624	72981	0.771429	0.228571	22.8571	T.flavopunctata removed	2
54	T.flavopunctata present	24552	5100	19452	0.792278	0.207722	20.7722	T.flavopunctata present	2
56	T.flavopunctata present	73600	765	72835	0.989606	0.010394	1.0394	T.flavopunctata present	2
57	T.flavopunctata present	17408	416	16992	0.976103	0.0238971	2.38971	T.flavopunctata present	2
59	T.flavopunctata removed	35178	9933	25245	0.717636	0.282364	28.2364	T.flavopunctata removed	2
60	T.flavopunctata removed	45360	921	44439	0.979696	0.0203042	2.03042	T.flavopunctata removed	2
62	T.flavopunctata removed	54653	35112	19541	0.357547	0.642453	64.2453	T.flavopunctata removed	3
63	T.flavopunctata present	34850	294	34556	0.991564	0.00843616	0.843615	T.flavopunctata present	3
65	T.flavopunctata present	62640	18	62622	0.999713	0.000287356	0.0287356	T.flavopunctata present	3
69	T.flavopunctata removed	36288	315	35973	0.991319	0.00868056	0.868056	T.flavopunctata removed	3
74	T.flavopunctata removed	15750	15984	-234	-0.0148571	1	100	T.flavopunctata removed	3
75	T.flavopunctata present	59400	32.5	59367.5	0.999453	0.000547138	0.0547138	T.flavopunctata present	3
81	T.flavopunctata present	28520	990	27530	0.965288	0.0347125	3.47125	T.flavopunctata present	3
82	T.flavopunctata removed	60480	8256	52224	0.863492	0.136508	13.6508	T.flavopunctata removed	3
83	T.flavopunctata removed	37800	171	37629	0.995476	0.00452381	0.452381	T.flavopunctata removed	3
86	T.flavopunctata removed	34272	901	33371	0.97371	0.0262897	2.62897	T.flavopunctata removed	3
87	T.flavopunctata removed	22644	2100	20544	0.90726	0.0927398	9.27398	T.flavopunctata removed	3
89	T.flavopunctata removed	27300	252	27048	0.990769	0.00923077	0.923077	T.flavopunctata removed	3
